# Supplementary material for: HbA1c levels in schoolchildren with type 1 diabetes are seasonally variable and dependent on weather conditions
Source: PubMed Central journal article supplement — Diabetologia. 2010 Dec 25;54(4):749–56. doi: 10.1007/s00125-010-2013-4 (PMC3052478; doi:10.1007/s00125-010-2013-4), 2010-12-25
Supplement: 125_2010_2013_MOESM1_ESM.pdf [file 125_2010_2013_MOESM1_ESM.pdf]

**Electronic supplementary material**

**ESM Table 1** Characteristics of the study period

| Date   | Meteorological factors    |                                          |                                | HbA <sub>1c</sub> per group                   |        |      |      |                    |        |      |      |
|--------|---------------------------|------------------------------------------|--------------------------------|-----------------------------------------------|--------|------|------|--------------------|--------|------|------|
|        | Sunshine<br>(h per month) | Solar irradiance<br>(J/cm <sup>2</sup> ) | Ambient<br>temperature<br>(°C) | Preschool children (%)                        |        |      |      | Schoolchildren (%) |        |      |      |
|        |                           |                                          |                                | <i>n</i>                                      | Median | Q25  | Q75  | <i>n</i>           | Median | Q25  | Q75  |
| Aug-06 | 166.4                     | 39671                                    | 17.1                           | 3                                             | 7.00   | 6.60 | 8.40 | 60                 | 7.65   | 7.05 | 8.70 |
| Sep-06 | 226                       | 41653                                    | 16.1                           | 4                                             | 7.40   | 6.65 | 8.05 | 96                 | 7.45   | 6.95 | 8.10 |
| Oct-06 | 125.6                     | 22213                                    | 10.9                           | 6                                             | 7.55   | 7.10 | 8.40 | 87                 | 7.80   | 7.20 | 8.90 |
| Nov-06 | 50.8                      | 8489                                     | 6.0                            | 4                                             | 6.40   | 6.25 | 6.65 | 66                 | 7.80   | 7.10 | 8.40 |
| Dec-06 | 59                        | 6079                                     | 3.8                            | 4                                             | 7.40   | 6.70 | 7.60 | 52                 | 7.60   | 7.00 | 8.75 |
| Jan-07 | 44.4                      | 7121                                     | 3.4                            | 8                                             | 6.95   | 6.70 | 7.55 | 91                 | 7.70   | 7.00 | 8.50 |
| Feb-07 | 34.4                      | 11006                                    | 0.0                            | 4                                             | 7.65   | 7.35 | 7.75 | 64                 | 7.55   | 6.95 | 8.20 |
| Mar-07 | 144.6                     | 29674                                    | 6.3                            | 9                                             | 7.20   | 6.70 | 7.30 | 110                | 7.30   | 6.80 | 7.90 |
| Apr-07 | 271.6                     | 52077                                    | 9.6                            | 15                                            | 6.90   | 6.70 | 7.20 | 102                | 7.40   | 6.90 | 7.80 |
| May-07 | 292.9                     | 56948                                    | 15.1                           | 13                                            | 7.10   | 6.80 | 7.30 | 82                 | 7.35   | 6.90 | 7.90 |
| Jun-07 | 265.9                     | 53913                                    | 18.4                           | 3                                             | 7.00   | 7.00 | 7.00 | 29                 | 7.30   | 7.00 | 8.00 |
| Jul-07 | 213.3                     | 46444                                    | 18.3                           | Nationwide strike of healthcare professionals |        |      |      |                    |        |      |      |
| Aug-07 | 245.8                     | 46799                                    | 18.4                           | 4                                             | 6.80   | 6.35 | 7.20 | 70                 | 7.20   | 6.90 | 7.90 |
| Sep-07 | 154.2                     | 30358                                    | 12.7                           | 11                                            | 6.70   | 6.50 | 7.50 | 99                 | 7.20   | 6.60 | 8.00 |

| Date   | Meteorological factors    |                                          |                                | HbA <sub>1c</sub> per group |        |      |      |          |                    |      |      |  |
|--------|---------------------------|------------------------------------------|--------------------------------|-----------------------------|--------|------|------|----------|--------------------|------|------|--|
|        | Sunshine<br>(h per month) | Solar irradiance<br>(J/cm <sup>2</sup> ) | Ambient<br>temperature<br>(°C) | Preschool children (%)      |        |      |      |          | Schoolchildren (%) |      |      |  |
|        |                           |                                          |                                | <i>n</i>                    | Median | Q25  | Q75  | <i>n</i> | Median             | Q25  | Q75  |  |
| Oct-07 | 102.7                     | 17386                                    | 7.7                            | 13                          | 7.40   | 6.70 | 7.90 | 166      | 7.40               | 6.90 | 8.30 |  |
| Nov-07 | 29.6                      | 6323                                     | 1.5                            | 7                           | 6.90   | 6.90 | 7.60 | 84       | 7.45               | 6.80 | 8.65 |  |
| Dec-07 | 39.1                      | 4881                                     | 0.0                            | 6                           | 7.80   | 7.30 | 8.00 | 67       | 7.40               | 6.70 | 8.30 |  |
| Jan-08 | 53.7                      | 6760                                     | 1.5                            | 16                          | 7.60   | 7.25 | 8.00 | 133      | 7.70               | 7.10 | 8.60 |  |
| Feb-08 | 69.9                      | 12045                                    | 2.9                            | 15                          | 6.80   | 6.40 | 7.90 | 155      | 7.80               | 7.20 | 8.80 |  |
| Mar-08 | 105.5                     | 22989                                    | 3.5                            | 8                           | 7.20   | 7.00 | 8.15 | 81       | 7.60               | 7.00 | 8.40 |  |
| Apr-08 | 148                       | 34773                                    | 8.7                            | 10                          | 6.90   | 6.80 | 7.60 | 104      | 7.30               | 6.70 | 8.20 |  |
| May-08 | 256.7                     | 53566                                    | 13.5                           | 13                          | 7.20   | 6.70 | 7.40 | 114      | 7.70               | 7.00 | 8.40 |  |
| Jun-08 | 336.9                     | 62696                                    | 18.1                           | 9                           | 7.50   | 7.00 | 7.80 | 114      | 7.50               | 6.90 | 8.40 |  |
| Jul-08 | 288.1                     | 58141                                    | 19.5                           | 9                           | 7.20   | 6.50 | 7.70 | 106      | 7.50               | 6.90 | 8.20 |  |
| Aug-08 | 237.5                     | 43564                                    | 18.2                           | 8                           | 7.05   | 6.75 | 7.35 | 71       | 7.10               | 6.70 | 8.00 |  |
| Sep-08 | 99.4                      | 24998                                    | 12.6                           | 9                           | 6.90   | 6.60 | 7.10 | 63       | 7.30               | 6.80 | 8.10 |  |
| Oct-08 | 98                        | 17055                                    | 9.7                            | 13                          | 6.50   | 6.30 | 7.20 | 137      | 7.50               | 6.70 | 8.40 |  |
| Nov-08 | 54.2                      | 8506                                     | 5.2                            | 5                           | 6.70   | 6.30 | 8.10 | 87       | 7.60               | 7.10 | 8.40 |  |
| Dec-08 | 50.2                      | 5479                                     | 1.3                            | 12                          | 6.80   | 6.40 | 7.55 | 95       | 7.70               | 7.00 | 8.80 |  |
| Jan-09 | 61.8                      | 8054                                     | -2.9                           | 8                           | 6.70   | 6.40 | 7.00 | 131      | 7.40               | 6.80 | 8.20 |  |

| Date   | Meteorological factors    |                                          |                                | HbA <sub>1c</sub> per group |        |      |      |                    |        |      |      |
|--------|---------------------------|------------------------------------------|--------------------------------|-----------------------------|--------|------|------|--------------------|--------|------|------|
|        | Sunshine<br>(h per month) | Solar irradiance<br>(J/cm <sup>2</sup> ) | Ambient<br>temperature<br>(°C) | Preschool children (%)      |        |      |      | Schoolchildren (%) |        |      |      |
|        |                           |                                          |                                | <i>n</i>                    | Median | Q25  | Q75  | <i>n</i>           | Median | Q25  | Q75  |
| Feb-09 | 32.1                      | 10960                                    | -0.9                           | 8                           | 7.55   | 7.15 | 7.75 | 92                 | 7.70   | 7.10 | 8.75 |
| Mar-09 | 74.7                      | 20321                                    | 2.60                           | 11                          | 7.10   | 6.60 | 8.00 | 107                | 7.70   | 7.00 | 8.40 |
| Apr-09 | 302.4                     | 53433                                    | 11.5                           | 9                           | 7.00   | 6.70 | 7.20 | 94                 | 7.60   | 6.80 | 8.60 |
| May-09 | 256.7                     | 54305                                    | 13.2                           | 13                          | 7.00   | 6.80 | 7.80 | 94                 | 7.30   | 6.70 | 7.90 |
| Jun-09 | 182                       | 46576                                    | 15.4                           | 5                           | 6.60   | 6.60 | 7.50 | 87                 | 7.20   | 6.70 | 7.80 |
| Jul-09 | 278.8                     | 57993                                    | 19.3                           | 7                           | 7.00   | 6.80 | 7.80 | 128                | 7.40   | 6.80 | 7.95 |
| Aug-09 | 286                       | 51437                                    | 18.5                           | 4                           | 7.35   | 6.85 | 8.00 | 106                | 7.05   | 6.50 | 7.60 |
| Sep-09 | 196.5                     | 35291                                    | 15.0                           | 8                           | 6.90   | 6.80 | 7.30 | 91                 | 7.00   | 6.50 | 7.80 |
| Oct-09 | 57.9                      | 13629                                    | 6.7                            | 12                          | 7.00   | 7.00 | 7.60 | 94                 | 7.40   | 6.90 | 8.40 |

Q25 and Q75 represent the first and third quartile respectively.
