# Supplementary figures and images for: HbA1c levels in schoolchildren with type 1 diabetes are seasonally variable and dependent on weather conditions
Source: PubMed Central journal article supplement — Diabetologia. 2010 Dec 25;54(4):749–56. doi: 10.1007/s00125-010-2013-4 (PMC3052478; doi:10.1007/s00125-010-2013-4), 2010-12-25

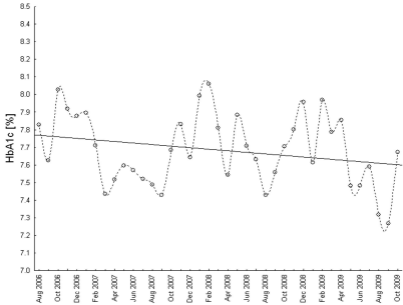

Supplement: 125_2010_2013_MOESM2_ESM.pdf [file 125_2010_2013_MOESM2_ESM.pdf]

HbA1c [%]

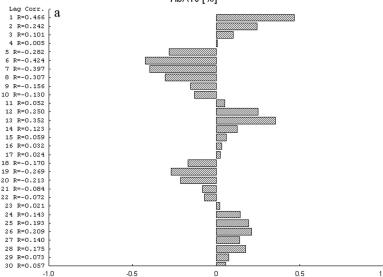

Sunny hours per month

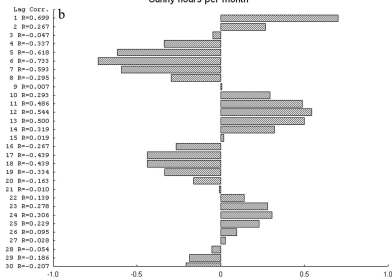

Ambient temperature [°C]

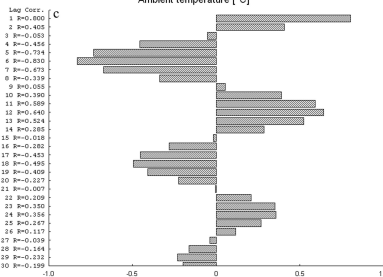Solar irradiance [J/cm<sup>2</sup>]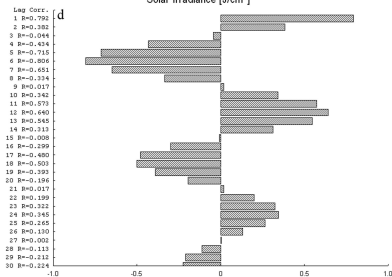

Supplement: 125_2010_2013_MOESM3_ESM.pdf [file 125_2010_2013_MOESM3_ESM.pdf]
